# Supplementary material
Source: Elsevier journal article supplement (https://www.sciencedirect.com/science/article/pii/S0300893224004767)

## SUPPLEMENTARY DATA

**Table 1 of the supplementary data.** Antithrombotic therapy at discharge

| Variables                                | Total<br>(n = 1225) | Suboptimal<br>implant +<br>nonintensive AT<br>(n = 160) | Suboptimal<br>implant +<br>intensive AT<br>(n = 308) | Optimal implant<br>+ nonintensive<br>AT<br>(n = 272) | Optimal implant<br>+ intensive AT<br>(n = 485) |
|------------------------------------------|---------------------|---------------------------------------------------------|------------------------------------------------------|------------------------------------------------------|------------------------------------------------|
| None                                     | 113 (9)             | 37 (23)                                                 | -                                                    | 76 (28)                                              | -                                              |
| Aspirin                                  | 319 (26)            | 123 (77)                                                | -                                                    | 196 (72)                                             | -                                              |
| Aspirin + inhibitor<br>P2Y <sub>12</sub> | 525 (43)            | -                                                       | 197 (64)                                             | -                                                    | 328 (68)                                       |
| Warfarin                                 | 25 (2)              | -                                                       | 11 (4)                                               | -                                                    | 17 (3)                                         |
| DOAC                                     | 122 (14)            | -                                                       | 66 (21)                                              | -                                                    | 101 (21)                                       |
| LMWH                                     | 73 (6)              | -                                                       | 34 (11)                                              | -                                                    | 39 (8)                                         |

AT, antithrombotic therapy; DOAC, direct oral anticoagulation; LMWH, low molecular weight heparin.

Values are expressed as No. (%).

**Table 2 of the supplementary data.** Baseline demographic and clinical characteristics according to optimal implantation

| <b>Variables</b>                                | <b>Total<br/>(n = 1225)</b> | <b>Suboptimal<br/>implant (n = 468)</b> | <b>Optimal implant<br/>(n = 757)</b> | <b>P</b> |
|-------------------------------------------------|-----------------------------|-----------------------------------------|--------------------------------------|----------|
| <i>Age, y</i>                                   | 75.9 ± 10                   | 75.7 ± 11.3                             | 76.0 ± 10.0                          | .70      |
| <i>Female sex</i>                               | 429 (35.0)                  | 168 (35.9)                              | 261 (34.5)                           | .61      |
| <i>Body mass index, kg/m<sup>2</sup></i>        | 27.4 ± 5.1                  | 27.6 ± 5.3                              | 27.2 ± 4.9                           | .23      |
| <i>AF type</i>                                  |                             |                                         |                                      | .01      |
| Paroxysmal                                      | 507 (41)                    | 168 (36)                                | 338 (45)                             |          |
| Persistent                                      | 88 (7)                      | 37 (8)                                  | 51 (7)                               |          |
| Permanent                                       | 630 (52)                    | 263 (56)                                | 367 (48)                             |          |
| <i>Hypertension</i>                             | 1053 (86.0)                 | 397 (84.8)                              | 656 (86.7)                           | .47      |
| <i>Diabetes</i>                                 | 377 (30.7)                  | 144 (30.8)                              | 232 (30.6)                           | .44      |
| <i>Smoking</i>                                  | 167 (13.6)                  | 61 (13.0)                               | 106 (14.0)                           | .62      |
| <i>Chronic heart failure</i>                    | 318 (26.0)                  | 132 (28.2)                              | 186 (24.6)                           | .17      |
| <i>Previous CAD</i>                             | 404 (33.0)                  | 158 (33.8)                              | 246 (32.5)                           | .63      |
| <i>Previous ischemic stroke</i>                 | 255 (20.9)                  | 87 (18.6)                               | 168 (22.2)                           | .13      |
| <i>Previous bleed event</i>                     | 1052 (85.9)                 | 405 (86.5)                              | 647 (85.5)                           | .60      |
| <i>Type of bleed event</i>                      |                             |                                         |                                      | .87      |
| Gastrointestinal                                | 486 (46)                    | 183 (45)                                | 303 (47)                             |          |
| Intracranial                                    | 338 (32)                    | 134 (33)                                | 204 (32)                             |          |
| Abdominal/renal                                 | 76 (7)                      | 26 (7)                                  | 50 (7)                               |          |
| ENT bleed                                       | 51 (5)                      | 22 (5)                                  | 29 (4)                               |          |
| Pulmonary                                       | 19 (2)                      | 7 (2)                                   | 13 (2)                               |          |
| Others                                          | 85 (8)                      | 34 (8)                                  | 51 (8)                               |          |
| <i>CHA<sub>2</sub>DS<sub>2</sub>-VASc score</i> | 4.4 ± 1.5                   | 4.5 ± 1.4                               | 4.4 ± 1.4                            | .50      |
| <i>Baseline stroke risk</i>                     | 6.0 ± 2.8                   | 6.0 ± 2.9                               | 5.9 ± 2.8                            | .73      |
| <i>HAS-BLED score</i>                           | 3.4 ± 1.0                   | 3.4 ± 1.1                               | 3.4 ± 1.0                            | .56      |
| <i>Previous AT therapy</i>                      |                             |                                         |                                      |          |
| None                                            | 278 (22.7)                  | 105 (22.4)                              | 173 (22.9)                           | .87      |
| Aspirin                                         | 366 (29.9)                  | 131 (28.0)                              | 235 (31.0)                           | .26      |
| P2Y <sub>12</sub>                               | 91 (7.4)                    | 36 (7.7)                                | 55 (7.3)                             | .78      |
| Warfarin                                        | 165 (13.5)                  | 56 (12.0)                               | 109 (14.4)                           | .22      |
| DOAC                                            | 357 (29.1)                  | 137 (29.3)                              | 220 (29.1)                           | .94      |
| LMWH                                            | 138 (11.3)                  | 64 (13.7)                               | 74 (9.8)                             | .07      |
| <i>eGFR, mL/min/1.73m<sup>2</sup></i>           | 66.1 [46-98]                | 66.0 [46-97]                            | 64.7 [46.8-93]                       | .87      |
| <i>Dialysis</i>                                 | 65 (6.0)                    | 18 (4.4)                                | 47 (7.0)                             | .082     |
| <i>LVEF, %</i>                                  | 55.4 ± 10.3                 | 54.9 ± 11.1                             | 55.7 ± 9.8                           | .21      |

AF, atrial fibrillation; ENT, ear, nose, throat; CAD, coronary artery disease, CHADS-VASc score, congestive heart failure, hypertension, age > 75 years, age 65 to 74 years, diabetes mellitus, stroke/transient ischemic attack/thromboembolism, vascular disease, female sex; AT, antithrombotic therapy; eGFR, estimated glomerular filtrated rate; LVEF, left ventricular ejection fraction.

Values are expressed as No. (%), mean ± standard deviation, or median [interquartile range].



**Table 3 of the supplementary data.** Clinical outcomes at 3 months and 1 year of follow-up

| Variables                                          | Total<br>(n = 1225) | Suboptimal<br>implant +<br>nonintensive<br>AT<br>(n = 160) | Suboptimal<br>implant +<br>intensive AT<br>(n = 308) | Optimal<br>implant +<br>nonintensive<br>AT<br>(n = 272) | Optimal<br>implant +<br>intensive AT<br>(n = 485) | <i>P</i> |
|----------------------------------------------------|---------------------|------------------------------------------------------------|------------------------------------------------------|---------------------------------------------------------|---------------------------------------------------|----------|
| <i>Clinical outcomes at 3 months of follow-up</i>  |                     |                                                            |                                                      |                                                         |                                                   |          |
| Ischemic stroke<br>(n = 1200)                      | 4 (0.3)             | 0                                                          | 4 (1.3)                                              | 0                                                       | 0                                                 | .014     |
| Systemic embolism                                  | 0                   | 0                                                          | 0                                                    | 0                                                       | 0                                                 | -        |
| Major bleeding<br>(BARC ≥3) (n = 1175)             | 46 (3.9)            | 6 (4.1)                                                    | 12 (3.9)                                             | 12 (4.9)                                                | 16 (3.4)                                          | .78      |
| ICH (n = 1200)                                     | 1 (0.1)             | 0                                                          | 1 (0.3)                                              | 0                                                       | 0                                                 | 1.00     |
| All-cause mortality                                | 19 (1.6)            | 2 (1.3)                                                    | 6 (1.9)                                              | 4 (1.5)                                                 | 7 (1.5)                                           | .93      |
| <i>Clinical outcomes at 12 months of follow-up</i> |                     |                                                            |                                                      |                                                         |                                                   |          |
| Ischemic stroke<br>(n = 1200)                      | 11 (0.9)            | 0                                                          | 5 (1.6)                                              | 0                                                       | 6 (1.2)                                           | .11      |
| Systemic embolism                                  | 2 (0.2)             | 0                                                          | 1 (0.5)                                              | 1 (0.5)                                                 | 0                                                 | .41      |
| Major bleeding<br>(BARC ≥3) (n = 1175)             | 82 (7.0)            | 10 (6.8)                                                   | 25 (8.1)                                             | 19 (7.8)                                                | 28 (5.8)                                          | .61      |
| ICH (n = 1200)                                     | 1 (0.1)             | 0                                                          | 1 (0.3)                                              | 0                                                       | 0                                                 | 1.00     |
| All-cause mortality                                | 110 (8.9)           | 14 (8.8)                                                   | 29 (9.4)                                             | 22 (8.1)                                                | 45 (9.3)                                          | .94      |

ICH, intracranial hemorrhage; DRT, device-related thrombus.

Values are expressed as No. (%).

**Figure 1 of the supplementary data.** Device-related thrombus rates according to implant features and antithrombotic therapy at discharge by device type. Proportion of patients with DRT by device type. A) Single-lobe group. B) Disc/lobe group. AT, antithrombotic therapy; DRT, device-related thrombus.

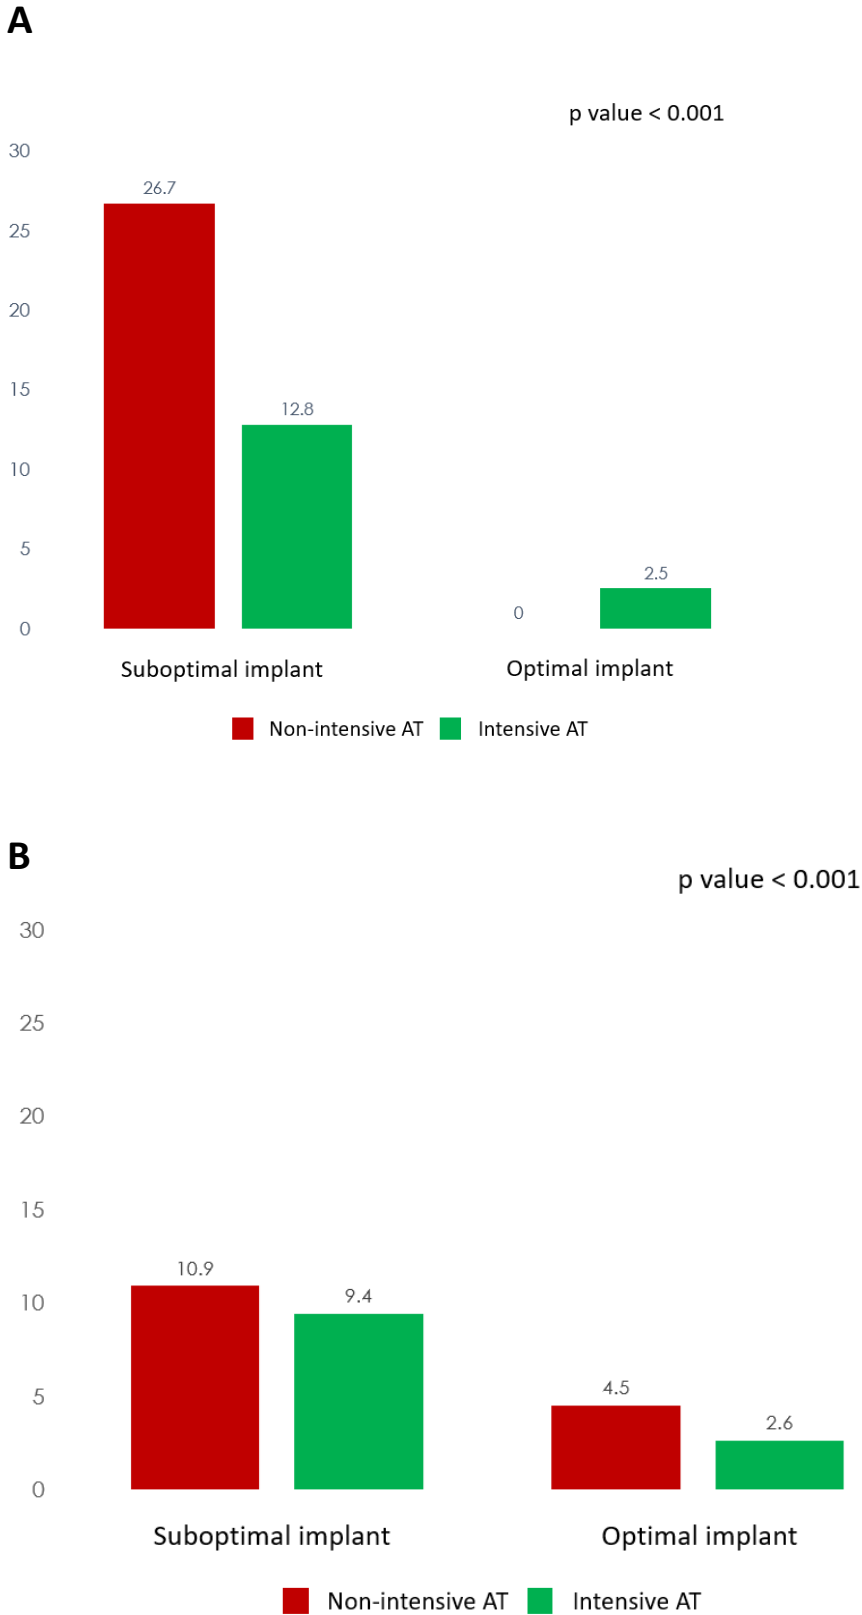

Supplement: mmc1 [file mmc1.pdf]
